# Supplementary material for: Association betweenBDNFrs6265 and Obesity in the Boston Puerto Rican Health Study
Source: Hindawi journal article supplement (doi:10.1155/2012/102942), 2012-01-01
Supplement: f1 [file 102942.f1.pdf]

Supplemental table 1. Interaction between *BDNF* rs6265 genotype and dietary factors on BMI in Puerto Rican adults

| Dietary factor            |        | Men                 |                    |              |                      | Women               |                      |              |                      |
|---------------------------|--------|---------------------|--------------------|--------------|----------------------|---------------------|----------------------|--------------|----------------------|
|                           |        | GG                  | GA+AA              | <i>P</i>     | <i>P</i> Interaction | GG                  | GA+AA                | <i>P</i>     | <i>P</i> Interaction |
| Food intake (g/d)         | <3532  | 28.3±0.6<br>(n=113) | 27.3±0.9<br>(n=37) | 0.283        | 0.684                | 32.3±0.4<br>(n=359) | 32.9±0.6<br>(n=126)  | 0.378        | 0.308                |
|                           | ≥3532  | 31.2±0.6<br>(n=128) | 29.7±0.8<br>(n=57) | 0.095        |                      | 32.3±0.5<br>(n=236) | 34.0±0.1<br>(n=90)   | 0.060        |                      |
| Total energy (kcal/d)     | <2270  | 29.7±0.7<br>(n=94)  | 28.3±0.9<br>(n=42) | 0.154        | 0.586                | 32.4±0.4<br>(n=403) | 33.1±0.6<br>(n=134)  | 0.261        | 0.319                |
|                           | ≥2270  | 29.9±0.6<br>(n=147) | 29.1±0.8<br>(n=52) | 0.336        |                      | 31.1±0.6<br>(n=192) | 33.9±0.8<br>(n=82)   | 0.064        |                      |
| Protein intake (% energy) | <16.89 | 29.2±0.6<br>(n=142) | 27.7±0.7<br>(n=58) | 0.054        | 0.234                | 31.8±0.4<br>(n=320) | 32.3±0.6<br>(n=116)  | 0.492        | 0.159                |
|                           | ≥16.89 | 30.7±0.7<br>(n=99)  | 30.7±1.1<br>(n=36) | 0.985        |                      | 32.9±0.5<br>(n=275) | 34.8±0.7<br>(n=100)  | <b>0.020</b> |                      |
| SFA (%energy)             | <9.63  | 29.9±0.8<br>(n=117) | 28.3±0.9<br>(n=46) | 0.082        | 0.502                | 32.1±0.4<br>(n=337) | 32.3±0.7<br>(n=117)  | 0.807        | <b>0.045</b>         |
|                           | ≥9.63  | 29.9±0.6<br>(n=124) | 29.3±0.9<br>(n=48) | 0.533        |                      | 32.4±0.5<br>(n=258) | 34.8±0.7<br>(n=99)   | <b>0.003</b> |                      |
| PUFA (%energy)            | <8.76  | 29.5±0.7<br>(n=114) | 27.4±0.9<br>(n=42) | <b>0.025</b> | <b>0.042</b>         | 31.9±0.4<br>(n=306) | 32.3±0.7<br>(n=105)  | 0.649        | 0.135                |
|                           | ≥8.76  | 30.0±0.6<br>(n=127) | 30.1±0.8<br>(n=52) | 0.890        |                      | 32.4±0.4<br>(n=289) | 34.4±0.7<br>(n=111)  | <b>0.008</b> |                      |
| N-3 : N-6 PUFA ratio      | <0.09  | 29.4±0.6<br>(n=138) | 29.0±0.7<br>(n=55) | 0.612        | 0.180                | 31.9±0.4<br>(n=299) | 33.0±0.7<br>(n=99)   | 0.182        | 0.462                |
|                           | ≥0.09  | 30.4±0.7<br>(n=102) | 28.2±1.1<br>(n=37) | <b>0.043</b> |                      | 32.3±0.4<br>(n=286) | 33.4±0.64<br>(n=116) | 0.166        |                      |

*P*-values and means were adjusted for age, smoking status, drinking status, education, medication use for depression, physical activity, total energy and population admixture.

Supplemental table 2. Interaction between *BDNF* rs6265 genotype and nutrition factors on waist circumference in Puerto Rican adults

| Dietary factor               |        | Men                  |                     |              |                      | Women                |                      |              |                      |
|------------------------------|--------|----------------------|---------------------|--------------|----------------------|----------------------|----------------------|--------------|----------------------|
|                              |        | GG                   | GA+AA               | <i>P</i>     | <i>P</i> Interaction | GG                   | GA+AA                | <i>P</i>     | <i>P</i> Interaction |
| Food intake<br>(g/d)         | <3532  | 99.0±1.8<br>(n=113)  | 95.6±2.8<br>(n=37)  | 0.224        | 0.52                 | 100.8±0.8<br>(n=359) | 102.5±1.3<br>(n=126) | 0.254        | 0.872                |
|                              | ≥3532  | 107.1±1.7<br>(n=128) | 101.5±2.1<br>(n=57) | <b>0.014</b> |                      | 101.2±1.1<br>(n=236) | 103.3±1.2<br>(n=90)  | 0.27         |                      |
| Energy intake<br>(kcal/d)    | <2270  | 102.1±2.1<br>(n=94)  | 97.2±2.9<br>(n=42)  | 0.096        | 0.698                | 100.9±0.8<br>(n=403) | 103.0±1.3<br>(n=134) | 0.157        | 0.889                |
|                              | ≥2270  | 104.1±1.6<br>(n=147) | 100.1±2.2<br>(n=52) | 0.076        |                      | 101.4±1.2<br>(n=192) | 103.2±1.8<br>(n=82)  | 0.381        |                      |
| Protein intake<br>(% energy) | <16.89 | 101.7±1.7<br>(n=142) | 95.8±2.2<br>(n=58)  | <b>0.013</b> | 0.192                | 99.5±0.9<br>(n=320)  | 99.9±1.4<br>(n=116)  | 0.792        | 0.106                |
|                              | ≥16.89 | 105.6±1.8<br>(n=99)  | 104.4±2.8<br>(n=36) | 0.792        |                      | 102.5±1.0<br>(n=275) | 106.5±1.6<br>(n=100) | <b>0.028</b> |                      |
| SFA<br>(% energy)            | <9.63  | 103.4±2.0<br>(n=117) | 99.3±2.4<br>(n=46)  | 0.085        | 0.718                | 100.4±0.9<br>(n=337) | 101.1±1.4<br>(n=117) | 0.66         | 0.206                |
|                              | ≥9.63  | 104.2±1.7<br>(n=124) | 99.3±2.5<br>(n=48)  | 0.062        |                      | 101.6±1.1<br>(n=258) | 105.2±1.6<br>(n=99)  | 0.056        |                      |
| PUFA<br>(% energy)           | <8.76  | 101.8±1.9<br>(n=114) | 94.0±2.5<br>(n=42)  | <b>0.003</b> | <b>0.018</b>         | 100.3±1.0<br>(n=306) | 102.5±1.6<br>(n=105) | 0.226        | 0.987                |
|                              | ≥8.76  | 104.3±1.6<br>(n=127) | 103.8±2.3<br>(n=52) | 0.839        |                      | 101.5±0.9<br>(n=289) | 103.2±1.4<br>(n=111) | 0.178        |                      |
| N-3 : N-6 PUFA<br>ratio      | <0.09  | 101.4±1.5<br>(n=138) | 99.6±1.9<br>(n=55)  | 0.367        | 0.083                | 100.6±0.9<br>(n=299) | 101.8±1.5<br>(n=99)  | 0.452        | 0.780                |
|                              | ≥0.09  | 105.3±2.0<br>(n=102) | 97.7±3.1<br>(n=37)  | <b>0.017</b> |                      | 100.8±1.0<br>(n=286) | 103.2±1.5<br>(n=116) | 0.178        |                      |

*P*-values and means were adjusted for age, smoking status, drinking status, education, medication use for depression, physical activity, total energy and population admixture.

Supplemental table 3. Interaction between *BDNF* rs6265 genotype and nutrition factors on hip in BPRHS

| Dietary factor              |        | Men                  |                      |              |                      | Women                |                      |              |                      |
|-----------------------------|--------|----------------------|----------------------|--------------|----------------------|----------------------|----------------------|--------------|----------------------|
|                             |        | GG                   | GA+AA                | <i>P</i>     | <i>P</i> Interaction | GG                   | GA+AA                | <i>P</i>     | <i>P</i> Interaction |
| Food intake<br>(g/d)        | <3532  | 101.9±1.3<br>(n=113) | 102.2±2.0<br>(n=37)  | 0.899        | <b>0.024</b>         | 109.9±0.8<br>(n=359) | 111.4±1.2<br>(n=126) | 0.27         | 0.299                |
|                             | ≥3532  | 108.7±1.4<br>(n=128) | 103.0±1.8<br>(n=57)  | <b>0.003</b> |                      | 110.8±1.1<br>(n=236) | 114.8±1.7<br>(n=90)  | <b>0.045</b> |                      |
| Energy intake<br>(kcal/d)   | <2270  | 104.3±1.6<br>(n=94)  | 103.3±2.26<br>(n=42) | 0.666        | 0.231                | 110.1±0.8<br>(n=403) | 110.5±1.2<br>(n=134) | 0.301        | 0.187                |
|                             | ≥2270  | 106.5±1.3<br>(n=147) | 102.3±1.7<br>(n=52)  | <b>0.016</b> |                      | 110.7±1.3<br>(n=192) | 115.3±1.8<br>(n=82)  | <b>0.031</b> |                      |
| Protein intake<br>(%energy) | <16.89 | 104.6±1.3<br>(n=142) | 100.0±1.7<br>(n=58)  | <b>0.011</b> | 0.101                | 109.1±0.9<br>(n=320) | 110.2±1.4<br>(n=116) | 0.465        | 0.116                |
|                             | ≥16.89 | 106.7±1.5<br>(n=99)  | 106.8±2.3<br>(n=36)  | 0.948        |                      | 111.4±1.0<br>(n=275) | 115.9±1.5<br>(n=100) | <b>0.009</b> |                      |
| SFA<br>(%energy)            | <9.63  | 105.7±1.7<br>(n=117) | 103.1±2.0<br>(n=46)  | 0.198        | 0.609                | 109.4±0.8<br>(n=337) | 110.4±1.3<br>(n=117) | 0.507        | 0.081                |
|                             | ≥9.63  | 106.0±1.2<br>(n=124) | 102.5±1.9<br>(n=48)  | 0.074        |                      | 110.1±1.4<br>(n=258) | 115.9±1.6<br>(n=99)  | <b>0.010</b> |                      |
| PUFA<br>(%energy)           | <8.76  | 105.9±1.6<br>(n=114) | 99.7±2.1<br>(n=42)   | <b>0.005</b> | <b>0.009</b>         | 109.4±0.9<br>(n=306) | 110.4±1.5<br>(n=105) | 0.526        | 0.166                |
|                             | ≥8.76  | 105.0±1.2<br>(n=127) | 105.3±1.8<br>(n=52)  | 0.861        |                      | 110.8±0.9<br>(n=289) | 115.2±1.4<br>(n=111) | <b>0.006</b> |                      |
| N-3 : N-6 PUFA<br>ratio     | <0.09  | 103.5±1.1<br>(n=138) | 103.1±1.4<br>(n=55)  | 0.790        | <b>0.038</b>         | 109.8±0.9<br>(n=299) | 113.1±1.5<br>(n=99)  | <b>0.049</b> | 0.458                |
|                             | ≥0.09  | 107.4±1.7<br>(n=102) | 101.4±2.6<br>(n=37)  | <b>0.019</b> |                      | 109.9±0.9<br>(n=286) | 111.9±1.4<br>(n=116) | 0.230        |                      |

*P*-values and means were adjusted for age, smoking status, drinking status, education, medication use for depression, physical activity, total energy and population admixture.
